# Supplementary material
Source: PubMed Central journal article supplement (PMC6761044)
Supplement: NIHMS1535794-supplement-Supplemental_Material.pdf [file NIHMS1535794-supplement-Supplemental_Material.pdf]

## Supplemental Material

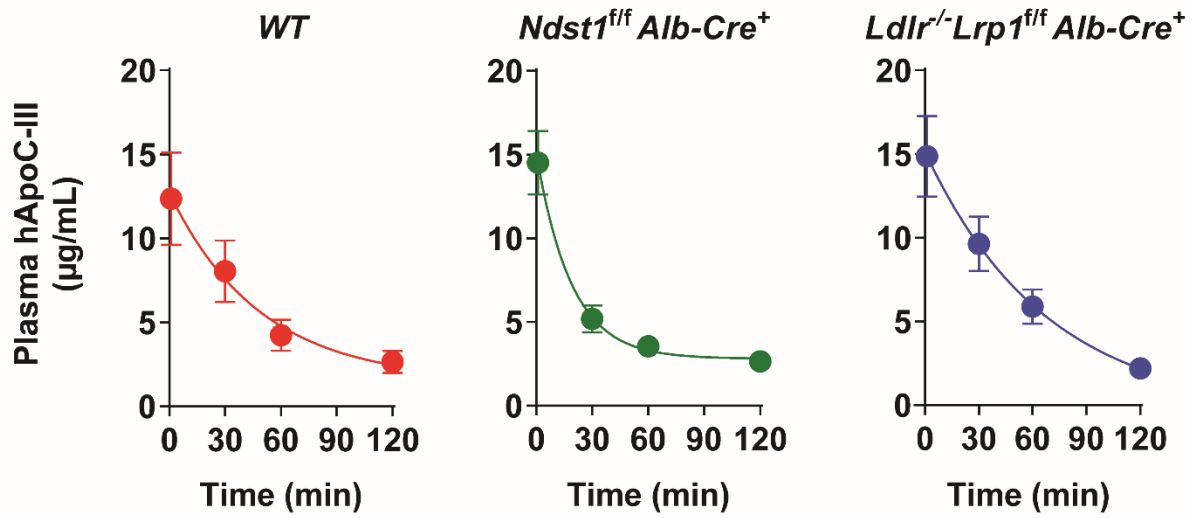

**Supplemental Figure I: Changes in absolute concentrations of human apoC-III in murine plasma after human TRL injection.** Human apoC-III concentrations in plasma of wild-type ( $n = 7$ , WT),  $Ndst1^{f/f} Alb-Cre^+$  ( $n = 7$ ), and  $Ldlr^{-/-} Lrp1^{f/f} Alb-Cre^+$  ( $n = 5$ ) mice 1, 30, 60 and 120 min post-injection showed statistically significant decreases over time in all mouse types ( $p < 0.001$ ), and the changes significantly differed among the mouse groups ( $p = 0.04$ ). The half-life was determined by a nonlinear interpolation of pooled data (values represent mean  $\pm$  SEM).
